# Supplementary material
Source: Research Square preprint supplement (doi:10.21203/rs.3.rs-8671832/v1)
Supplement: Supplementary file 1 [file db8b1e991e52e2e107f2dbaa.docx]

**Tables**

**Table 1. Characteristics of the participants**

| **Participant number** | **Age** | **Gender** | **Marital status** | **An additional disease** |
| --- | --- | --- | --- | --- |
| K1 | 55 | Woman | Married | Hypertension |
| K2 | 78 | Male | Married | Hypertension, Anxiety disorder |
| K3 | 68 | Male | Married | Hypertension, Asthma |
| K4 | 60 | Woman | Married | Hypertension, Type 2 Diabetes |
| K5 | 53 | Male | Married | Hypertension |
| K6 | 55 | Male | Married | Type 2 Diabetes, Hypertension, Chronic renal failure |
| K7 | 66 | Married | Married | Chronic Obstructive Pulmonary Disease |
| K8 | 60 | Male | Married | Hypertension |
| K9 | 77 | Male | Married | Hypertension |
| K10 | 62 | Woman | Married | Hypertension, Type 2 Diabetes, Cholesterol |
| K11 | 74 | Woman | Single | No |
| K12 | 70 | Male | Married | Hypertension, Type 2 Diabetes, Cholesterol |
| K13 | 74 | Male | Married | Hypertension, Type 2 Diabetes, Cholesterol, Chronic renal failure |

**Table 2 Burden of disease and sexual life in patients with heart disease**

| **Themes** | **Sub Themes** | **Codes** |
| --- | --- | --- |
| **1.** **Problems experienced and burdens of the disease** | **A. Physical problems**  **B. Mental problems**  **C. Social problems** | A1. Feeling of tightness in the chest  A2.Decrease in days/number of sexual activity  A3. Fatigue/weakness  A4. Difficulty in performing daily tasks  A5. Sweating  A6. Fainting sensation  A7. Dizziness  A8.Weight loss  A9. Loss of appetite  A10.Decreased sexual performance  A11. Numbness in the arm  A12. Weakness  A13. Shortness of breath  A14. Loss of consciousness  A15. Difficulty climbing stairs  B1. Despair  B2. Feeling of loss of control  B3. Depression  B4. Sadness  B5. Panic  B6. Anxiety  B7. Fear of death  B8. Hopelessness  B9. Fear of the future  C1. Restriction of life  C2. Decreased quality of life  C3. Constantly thinking about death  C4. Disconnection from social life  C5. Difficulty in fulfilling family roles and responsibilities |
| **2.The effects of the disease on sexual life** | **A.** **Problems related to sexual life**  **B.** **Spouse and sexual life**  **C.** **Coping with sexuality-related problems** | A1. Shortness of breath during sexual intercourse  A2.Rapid fatigue during sexual performance  A3. Decreased sexual desire  A4. Sexual dissatisfaction  A5. Sexual self-dislike  A6.Sexual withdrawal  A7. Getting tired quickly during sexual intercourse  B1. Spouse's understanding of the illness  B2. Self-pity of the spouse  B3. Thinking that you cannot satisfy your spouse  B4. To endure to make your spouse happy  B5. Keeping distance between him/her and his/her spouse  C1. Patience  C2. Praying  C3. Abstaining from sexual life  C4. Getting psychological support from your spouse  C6. Patience and understanding of the spouse |
